# Supplementary material for: Reducing catheter-associated urinary tract infections: a systematic review of barriers and facilitators and strategic behavioural analysis of interventions
Source: Implement Sci. 2020 Jul 6;15:44. doi: 10.1186/s13012-020-01001-2 (PMC7336619; doi:10.1186/s13012-020-01001-2)
Supplement: Supplementary file 8 — Additional file 8. MMAT study quality rating [file 13012_2020_1001_MOESM8_ESM.xlsx]

## Sheet: Sheet1
	SCREENING QUESTIONS		1. QUALITATIVE STUDIES					3. NON-RANDOMIZED STUDIES					4. QUANTITATIVE DESCRIPTIVE STUDIES					5. MIXED METHODS STUDIES
Citation	S1. Are there clear research questions?	S2. Do the collected data allow to address the research questions?	1.1. Is the qualitative approach appropriate to answer the research question?	1.2. Are the qualitative data collection methods adequate to address the research question?	1.3. Are the findings adequately derived from the data?	1.4. Is the interpretation of results sufficiently substantiated by data?	1.5. Is there coherence between qualitative data sources, collection, analysis and interpretation?	3.1. Are the participants representative of the target population?	3.2. Are measurements appropriate regarding both the outcome and intervention (or exposure)?	3.3. Are there complete outcome data?	3.4. Are the confounders accounted for in the design and analysis?	3.5. During the study period, is the intervention administered (or exposure occurred) as intended?	4.1. Is the sampling strategy relevant to address the research question?	4.2. Is the sample representative of the target population?	4.3. Are the measurements appropriate?	4.4. Is the risk of nonresponse bias low?	4.5. Is the statistical analysis appropriate to answer the research question?	5.1. Is there an adequate rationale for using a mixed methods design to address the research question?	5.2. Are the different components of the study effectively integrated to answer the research question?	5.3. Are the outputs of the integration of qualitative and quantitative components adequately interpreted?	5.4. Are divergences and inconsistencies between quantitative and qualitative results adequately addressed?	5.5. Do the different components of the study adhere to the quality criteria of each tradition of the methods involved?
Community care
Getliffe & Newton 2006. [19]	Yes	Yes	Yes	Yes	Yes	Yes	Yes
Nursing home
Krein et al. 2017. [20]	Yes	Yes	Yes	Yes	Yes	Yes	Yes
Secondary care
Krein et al 2013. [21]	Yes	Yes	Yes	Can't tell	Yes	Yes	Yes
Harrod et al. 2013. [22]	Yes		Yes	Yes	Yes	Yes	Yes
Alexaitis & Broome, 2014. [23]	No	Can't tell	Can't tell	Can't tell	Can't tell	Can't tell	Can't tell
Andreessen et al. 2012. [24]	Yes	Yes											No	No	Yes	Yes	Yes
Apisarnthanarak et al, 2017. [25]	Yes	Yes											Yes	Yes	Yes	Yes	Yes
Bursle et al. 2015. [26]	Yes	Yes						No	Yes	Yes	Can't tell	Yes
Carter et al. 2016. [27]	Can't tell	Yes	Yes	Yes	Yes	Yes	Yes
Carter et al. 2016. [28]	Yes	Yes	Yes	Yes	Yes	Yes	Yes
Hu et al. 2015. [29]	Yes	Yes																Yes	Yes	Yes	Yes	No
Conner et al. 2013. [30]	Yes	Yes																Yes	Yes	Yes	Yes	Yes
Conway et al. 2012. [31]	Yes	Yes																Yes	Yes	Yes	Yes	Yes
Crouzet et al. 2007. [32]	Yes	Yes						Yes	Yes	Yes	Can't tell	Yes
Dugyon-Escalante et al. 2015. [33]	Yes	Yes											Can't tell	Can't tell	Yes	Can't tell	Can't tell
Fakih et al. 2008. [34]	No	Can't tell											Can't tell	Yes	Yes	Yes	Can't tell
Fakih et al. 2013. [35]	No	Can't tell	Can't tell	Can't tell	Can't tell	Can't tell	Can't tell
Gupta et al. 2017. [36]	Yes	Yes																Yes	Yes	Yes	Yes	No
Mann et al. 2013. [37]	Yes	Can't tell											Can't tell	Can't tell	Can't tell	Can't tell	Can't tell
Murphy et al. 2015. [38]	Yes	Yes	Yes	Yes	Yes	Yes	Yes
Patrizzi et al. 2009. [39]	Can't tell	Can't tell											Can't tell	Can't tell	Can't tell	Can't tell	Can't tell
Smith et al. 2015. [40]	Can't tell	Can't tell											Can't tell	Can't tell	Can't tell	Can't tell	Can't tell
Tertiary care
Fakih et al. 2010. [41]	Yes	Yes											Yes	Yes	Yes	Yes	Yes
Trautner et al. 2014. [42]	Yes	Yes											Yes	Yes	Yes	Yes	Yes
Kolonoski et al. 2012. [43]	Can't tell	Can't tell																Can't tell	Can't tell	Yes	Yes	Can't tell
